# Supplementary material for: Cotargeting among microRNAs in the brain
Source: HighWire-hosted journal article supplement (doi:10.1101/gr.249201.119), 2019-10-24
Supplement: Supp_Table_S2.xlsx [file Supp_Table_S2.xlsx]

## Sheet: 102518_TableS2_sigmiRNACAD
Supplementary Table S2. miRNA expression in CAD cells, Related to Figure 1.
miRNA id	Expression, day 0	Expression, day 4	Fold Change (log2)	padj	CPM (log10)	neuronal z-score
mmu-miR-301a-3p	4097.6	2077.7	-0.98	0.012	3.577	z4
mmu-miR-212-3p	811.5	478.9	-0.761	0.0898	2.873	no
mmu-miR-322-5p	10732.2	19811.4	0.884	0.0954	3.995	no
mmu-miR-151-3p	3545.7	6556.3	0.887	0.0829	3.514	z2
mmu-miR-24-3p	13435.1	25286.2	0.912	0.0829	4.092	no
mmu-miR-140-5p	971.9	1879.1	0.951	0.0693	2.952	no
mmu-miR-30a-5p	12537.2	24287.8	0.954	0.0596	4.062	no
mmu-miR-30e-5p	7486.6	14625.4	0.966	0.0596	3.838	no
mmu-miR-497a-5p	514.5	1052.6	1.033	0.048	2.676	no
mmu-let-7e-5p	8478.1	17677.6	1.06	0.0297	3.892	no
mmu-miR-98-5p	400.7	847.3	1.08	0.0253	2.567	z4
mmu-miR-138-5p	9315.4	19790	1.087	0.0257	3.933	z4
mmu-miR-542-3p	937.5	2001.1	1.094	0.0829	2.936	no
mmu-miR-151-5p	3265.2	7021.1	1.105	0.0222	3.478	z2
mmu-miR-301b-3p	1129	2432.9	1.108	0.0275	3.017	no
mmu-miR-125b-5p	7358.5	16137.3	1.133	0.0165	3.831	no
mmu-miR-328-3p	1255.2	2768.3	1.141	0.0156	3.063	z3
mmu-miR-194-5p	278.3	618.9	1.153	0.0239	2.409	no
mmu-miR-137-3p	6765.8	15262.5	1.174	0.0139	3.794	z2
mmu-let-7g-5p	4330	9886.2	1.191	0.0089	3.601	no
mmu-miR-744-5p	1755	4060.4	1.21	0.0089	3.208	no
mmu-miR-26b-5p	5605.9	13056.5	1.22	0.0081	3.713	no
mmu-miR-183-5p	1821	4272.2	1.23	0.0171	3.224	no
mmu-miR-181d-5p	3307.3	7815.2	1.241	0.0066	3.484	z3
mmu-let-7d-5p	877.6	2100.8	1.259	0.0061	2.907	no
mmu-miR-145a-5p	563.6	1367.6	1.279	0.0071	2.715	no
mmu-miR-103-3p	13336.3	33171.3	1.315	0.0041	4.089	no
mmu-miR-190a-5p	1457.4	3649.6	1.324	0.0028	3.128	no
mmu-miR-344d-3p	1296.8	3263.4	1.331	0.0057	3.077	no
mmu-miR-1249-3p	398.5	1003.3	1.332	0.0046	2.565	no
mmu-miR-6540-5p	239.9	607.9	1.341	0.0049	2.344	no
mmu-miR-28a-3p	230	584.9	1.346	0.006	2.326	no
mmu-miR-10a-5p	6471.9	16600.5	1.359	0.0032	3.775	no
mmu-let-7a-5p	7395.2	19814.4	1.422	0.0012	3.833	no
mmu-miR-196b-5p	252.2	676	1.423	0.0027	2.366	no
mmu-miR-30d-5p	13468.4	36353.9	1.433	0.0015	4.093	no
mmu-miR-100-5p	652.7	1765.9	1.436	0.0017	2.779	no
mmu-miR-196a-5p	474.9	1307.1	1.461	0.0007	2.641	no
mmu-miR-107-3p	1479.6	4091.4	1.467	0.0012	3.134	no
mmu-let-7f-5p	5211.9	14774.3	1.503	0.0006	3.681	no
mmu-miR-361-5p	1554	4540.9	1.547	0.0005	3.156	no
mmu-miR-488-3p	1197.9	3501.1	1.547	0.0007	3.043	no
mmu-miR-708-5p	2486.2	7282.5	1.551	0.0004	3.36	no
mmu-miR-181c-5p	914.9	2685.2	1.553	0.0007	2.926	z4
mmu-miR-181a-5p	4107.8	12118.2	1.561	0.0004	3.578	z4
mmu-miR-146b-5p	1213.1	3627.1	1.58	0.0051	3.048	no
mmu-let-7b-5p	9134.9	27666.4	1.599	0.0002	3.925	no
mmu-miR-320-3p	2652.1	8397.7	1.663	0.0003	3.388	no
mmu-miR-195a-5p	1019.4	3258	1.676	0.0015	2.972	no
mmu-let-7i-5p	2522.8	8109	1.684	0.0001	3.366	no
mmu-miR-185-5p	348	1151.4	1.726	0.0004	2.506	no
mmu-miR-182-5p	26607.1	89834.9	1.755	0.0004	4.389	no
mmu-miR-652-3p	1449	4902.2	1.758	0.0001	3.125	no
mmu-miR-28a-5p	299.7	1020.7	1.768	0.0001	2.441	no
mmu-miR-143-3p	17947.9	63836.5	1.831	0.0015	4.218	no
mmu-miR-7b-5p	11240.3	42600.1	1.922	0.0001	4.015	no
mmu-miR-26a-5p	9435.8	37422.7	1.988	0	3.939	no
mmu-miR-152-3p	2443.8	12096.9	2.307	0	3.352	no
mmu-miR-210-3p	351.6	9196	4.709	0	2.51	no
